# Supplementary material for: Multiplexed engineering glycosyltransferase genes in CHO cells via targeted integration for producing antibodies with diverse complex-type N-glycans
Source: PubMed Central journal article supplement (PMC8217518; doi:10.1038/s41598-021-92320-x), 2021-06-21
Supplement: 41598_2021_92320_MOESM1_ESM.pdf [file 41598_2021_92320_MOESM1_ESM.pdf]

## **Supplementary information**

### **Title**

Multiplexed engineering glycosyltransferase genes in CHO cells via targeted integration for producing antibodies with diverse complex-type N-glycans

### **Authors and affiliations**

Ngan T.B. Nguyen, Jianer Lin, Shi Jie Tay, Mariati, Jessna Yeo, Terry Nguyen-Khuong, Yuansheng Yang\*

Bioprocessing Technology Institute, Agency for Science, Technology and Research (A\*STAR), Singapore, Singapore

\*Corresponding author: Dr. Yuansheng Yang, [yang\\_yuansheng@bti.a-star.edu.sg](mailto:yang_yuansheng@bti.a-star.edu.sg).

**Supplementary table S1.** List of primers for junction PCR analysis.

|   | <b>Name</b> | <b>Sequence (5'-3')</b>        |
|---|-------------|--------------------------------|
| 1 | <b>P1</b>   | AGGCAGCTGAGTTGTTGTATTCTGATAAGA |
| 2 | <b>R1</b>   | ACTGAAGCGAACAGGGACTCCAGAAGCCAG |
| 3 | <b>P2</b>   | CAACGAGGACTACACCATCGTGGAGCAGTA |
| 4 | <b>R2</b>   | CGACGCGCGTGAGGAAGAGTTCTTGCA    |

**Supplementary table 2.** List of primers for RT-PCR analysis.

|    | <b>Gene</b> | <b>Forward primer (5'-3')</b> | <b>Reverse primer (5'-3')</b> |
|----|-------------|-------------------------------|-------------------------------|
| 1  | GALE        | GGCACGGGCACAGGCTATTCA         | CTGGGGTTGGCGTAACAGGCT         |
| 2  | HGNE        | TCCCTCCCTTGTGATCCTCCTCCG      | GGCGGGGTCAACCAATCCGA          |
| 3  | NANS        | TGCAGTGTACCAGCGCATACCC        | GTTCCAACACCTTGGCCCCCA         |
| 4  | NANP        | GGGGACTGTGTGATGGTCGGTG        | GGGGACTGTGTGATGGTCGGTG        |
| 5  | CMAS        | CCGCACCTGGCAGCCCTAATTC        | CCCATACACTCTGGAAGGCCCC        |
| 6  | CST         | GCTGCCCCGAGAGACAATG           | CGGCTGTGGTTGAAAAGTAGAGT       |
| 7  | UGT         | GGTGCAGCAAAGCCATAGCC          | GGCAGAAAGGGCTCCGTGATGA        |
| 8  | UGNT        | GAACCCCTTACCCTGTGGCA          | CTTCTTGCTGTCTTCTGAGGCT        |
| 9  | GFT         | TGCGGTATCATCATCGGGGGC         | TGGCGTTGAGCGAGACACAGA         |
| 10 | GANC        | TTGCGGAGCTGACATAGCGGG         | GGGCTCTCGTCGCTTGGTGT          |
| 11 | MANEA       | TCCACAAGGGAGACACAACCCT        | ACCAAGAGAGGGCTAGTACACCA       |
| 12 | MAN1A1      | TGACAAGGCGCGTTCAGAGG          | TGCCCTTTTCTCGCGGATGGC         |
| 13 | MAN1B       | ACCAGTCCCTATTCCCAACT          | TGAGTTCATTATGTCCCCACCCA       |
| 14 | MAN1C1      | TTTCTCCGGGGGCATGATCGC         | AGCGGGCGTATGACTCGTGAC         |
| 15 | MAN2A2      | TCCCCCTCCAGGCCAACTTCT         | CATCAGCCGCCGGTCCAAGAT         |
| 16 | MAN2B1      | GTTCCAGGTGGTTCGCCTGT          | AGCGTCCCTTTGTCTCCAGCG         |
| 17 | MAN2B2      | CATGTACGCAACGCACCTGGC         | GCGGGTTGTAGACCAGGCAA          |
| 18 | MAN2C1      | TGGACTGCTGGCTGCACTTGT         | TGAGCTTCAGGCGGTTGTCCC         |
| 19 | MGAT1       | TGGAATGCCTGCTGCTCCTC          | AGGCGAATCACTTCCCGGGTG         |
| 20 | MGAT2       | CAGCTGATCGCCGGGGTGAAT         | AAGCGGCATTCTTCGGCAGGT         |
| 21 | MGAT3       | TCCACATGCGCAAGTCGCTCT         | TCGAGCCCATACTACTGCCTGC        |
| 22 | MGAT4A      | TGGGCATTCCCACAGTGAAGAGA       | CTCCAGGTTGGCTACACACCA         |
| 23 | MGAT4B      | CCTTCTGACGCTGCTGCTCT          | TCCCGCTGGTAAACGTCCACA         |
| 24 | MGAT4C      | GGGGAAACCACCTTCAACAGGAG       | CGTTTTCCCAACATCTAGGGCT        |
| 25 | MGAT5       | ATTTACGTGCGAGGGGATGCT         | ATTTACGTGCGAGGGGATGCT         |
| 26 | MGAT5B      | GAACCACGGCCTTTACC GCA         | AACCATTGGCGATGGCCTCCA         |
| 27 | B4GALT1     | ATTGGGGCTGGGGAGGAGAAGA        | TCATGCGACACCTCCCGACCA         |
| 28 | B4GALT2     | GTGGCCTTGTGGCCAGCAGC          | ATGACGGCCACGAGGAAGTGC         |
| 29 | B4GALT3     | GCCGAGATCAGGGACCGACAT         | GCAGACCTTGAGGAGCTGGAGG        |
| 30 | B4GALT4     | AGAGGGTGCCTCCTCGTTC           | TGCCATAATCCAGCTGCTGCC         |
| 31 | B4GALT5     | TCTCTCTCGTCTCGCTGCTGT         | CGTTGTCCCGGATCAGAATGCCT       |
| 32 | B4GALT6     | ACGGATGTGGAGAAATGCCACG        | TGTCAGCCCCTTACACCACCA         |
| 33 | B4GALT7     | CGGCATCCTGCTGCTCTCCAA         | ATGCGCCGGTAGAACTCGTCG         |
| 34 | ST3GAL1     | AAGTGCTCACCTTCTCGTGC          | GGACCATCTGCTTGGGGAACC         |
| 35 | ST3GAL2     | CAACCGTGGGCTTTGAGCAGG         | GAATCGGATCTGCCCGTGGAC         |
| 36 | ST3GAL3     | CCCCAGGAGAAGCCTGTTGCAG        | TTCAGGAGGAAGCCCAACCGA         |
| 37 | ST3GAL4     | TGGCTCTGGTCTGGTCGTCA          | CTGGAGGCACGGCTCCTTCTT         |
| 38 | ST3GAL5     | TCAGTTTGGCGGGTTTGGATA         | TCACCACTCCCTCTTTGACCAG        |
| 39 | ST3GAL6     | TGGGGAACGAATGTCTATTGGG        | ATCAGCCGCACACAGAAAAGG         |
| 40 | ST6GAL1     | AAGCTGCACCCCAATCAGCCC         | TCCACCTGGTCACACAGCGTC         |
| 41 | ST6GAL2     | AGGCGGGTGAAGAAGAGGCAC         | AGGCGCGGGTTCAGCATTTTG         |
| 42 | FUT8        | TGCTACCAACCCGAAGTGC           | GGCCCGTCTTCCCAATTTCT          |
| 43 | ACTIN       | AGCTGAGAGGGAAATGTGCG          | GCAACGGAACCGCTCATT            |

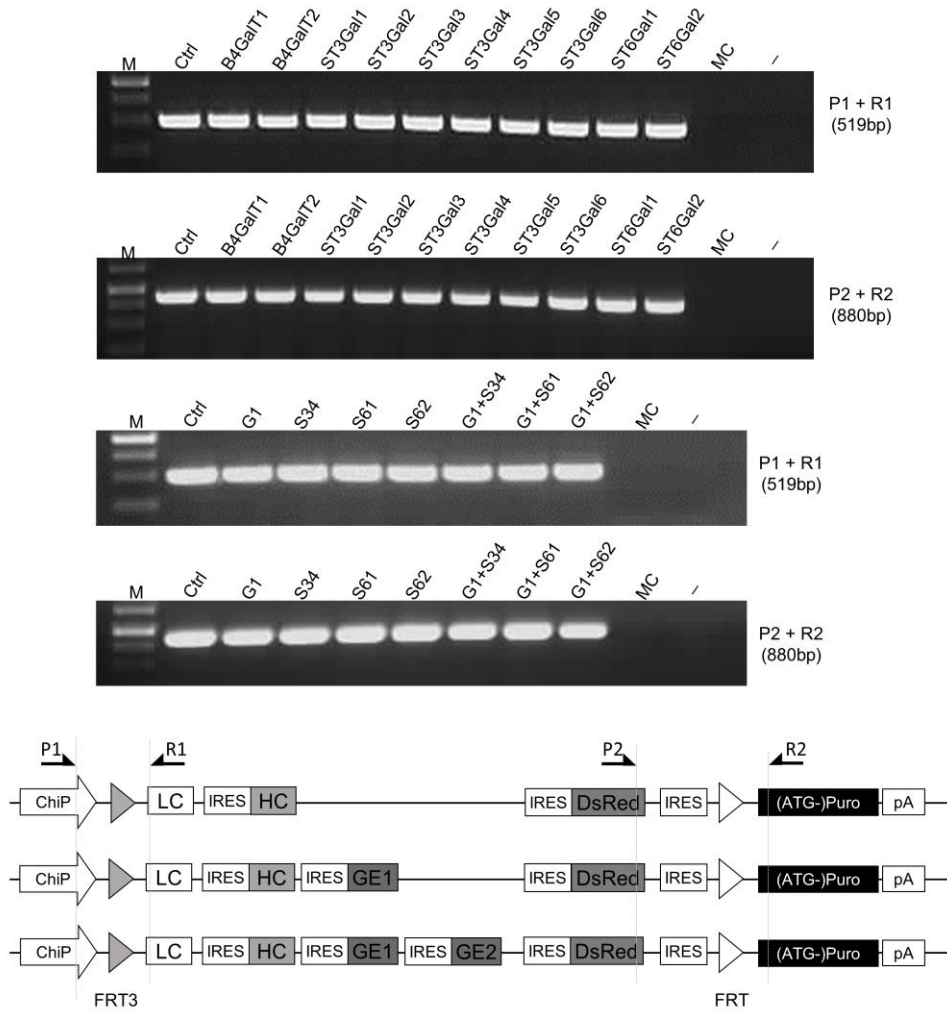

**Supplementary Figure S1.** Junction PCR performed on gDNA of stably transfected pools to show correct cassette exchange for stable pools derived from RMCE. PCR product generated using primer pair P1 and R1 confirmed integration across the FRT3 junction; and PCR product generated using P2 and R2 set confirmed integration across the FRT junction. Uncropped gel images can be found in Supplementary figure S6.

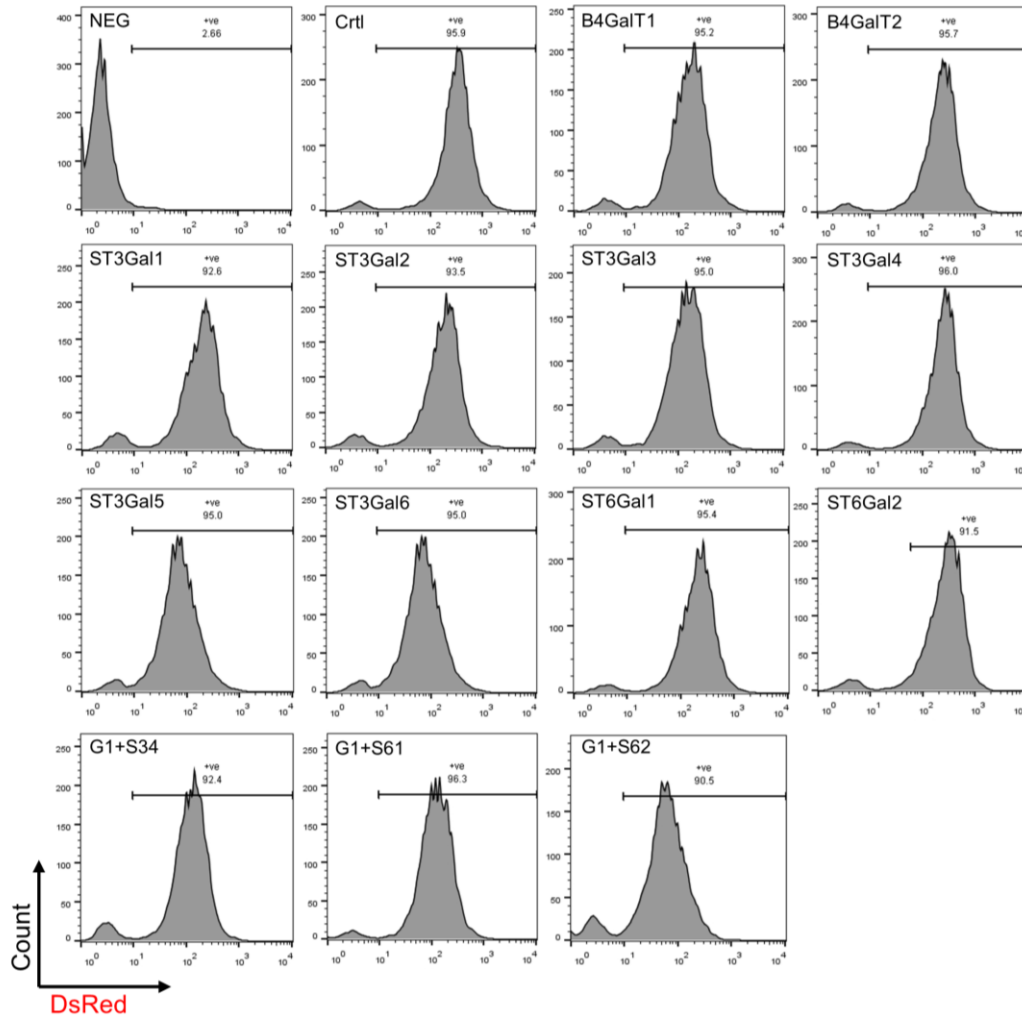

**Supplementary Figure S2.** FACS analysis of the stably transfected pools derived from RMCE at day 5 during fed-batch production. Plots of DsRed fluorescence vs count. Most pools displayed homogenous expression of DsRed fluorescense protein with more than 90% of cells were DsRed positive.

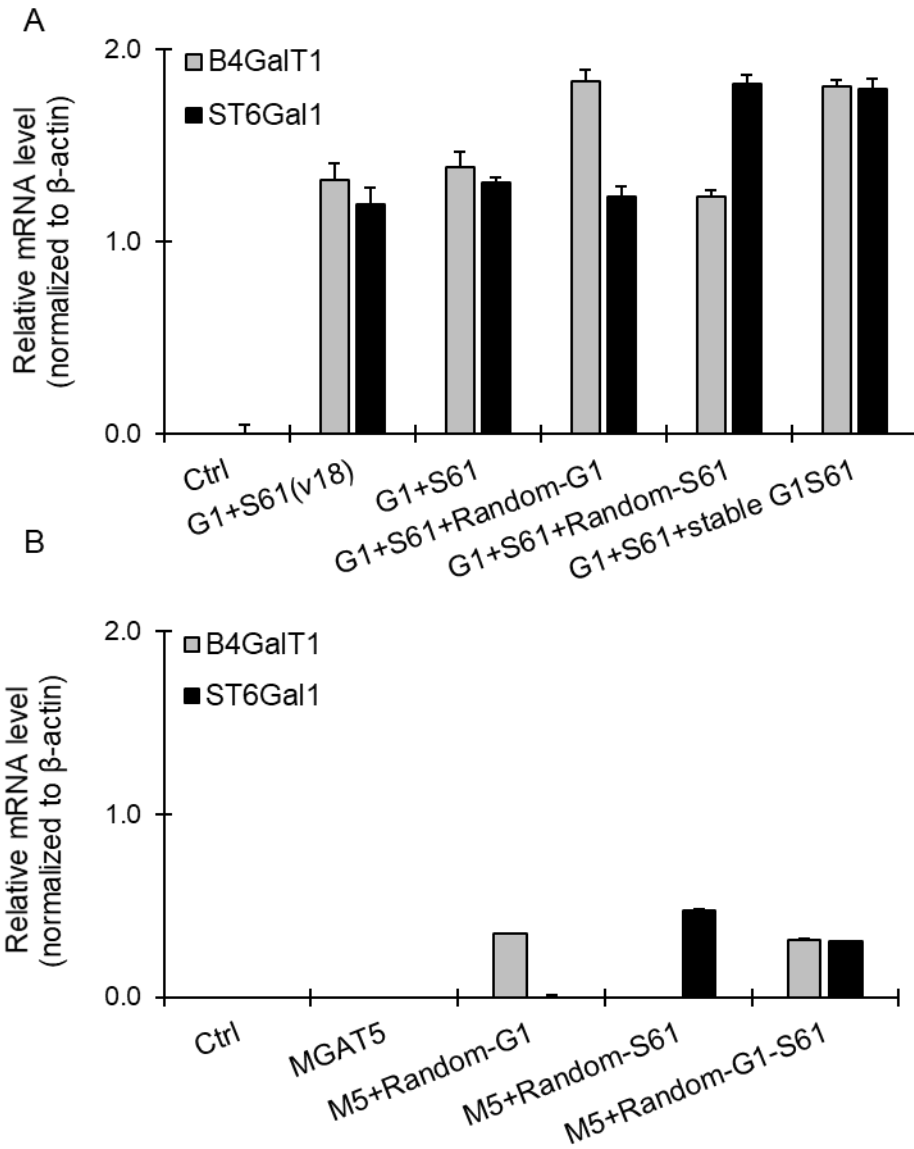

**Supplementary Figure S3.** qRT-PCR analysis for B4GalT1, ST6GalT1 transcript levels upon random integration of B4GalT1, ST6Gal1 gene individually or in combination into (A) G1+S61 targeted pool and (B) MGAT5 targeted pool.  $\beta$ -actin (ACT) was used as an internal control.

(a)

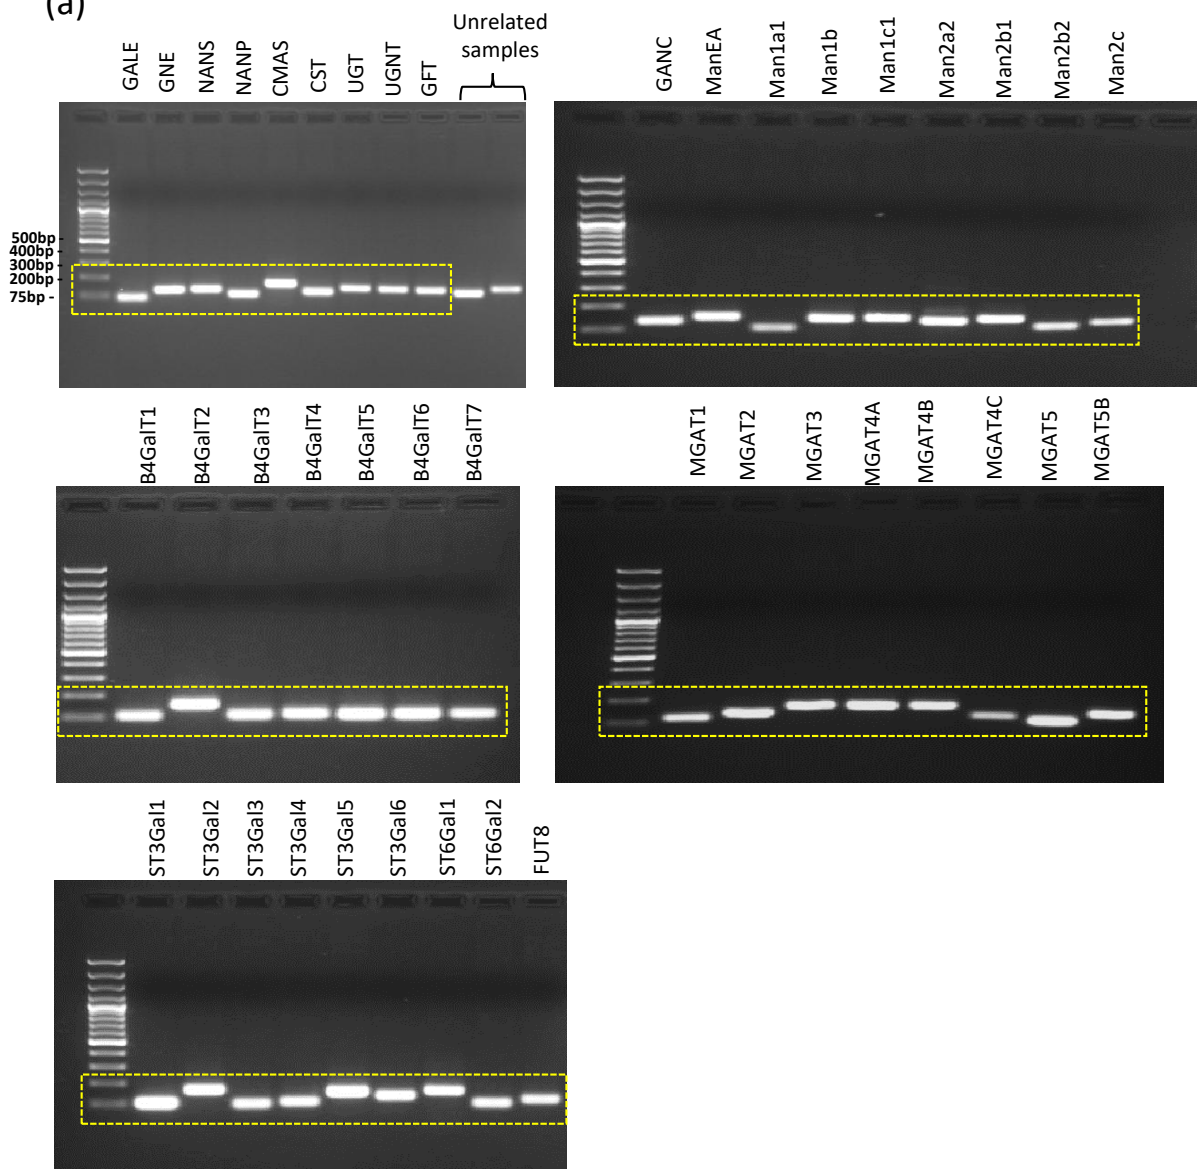

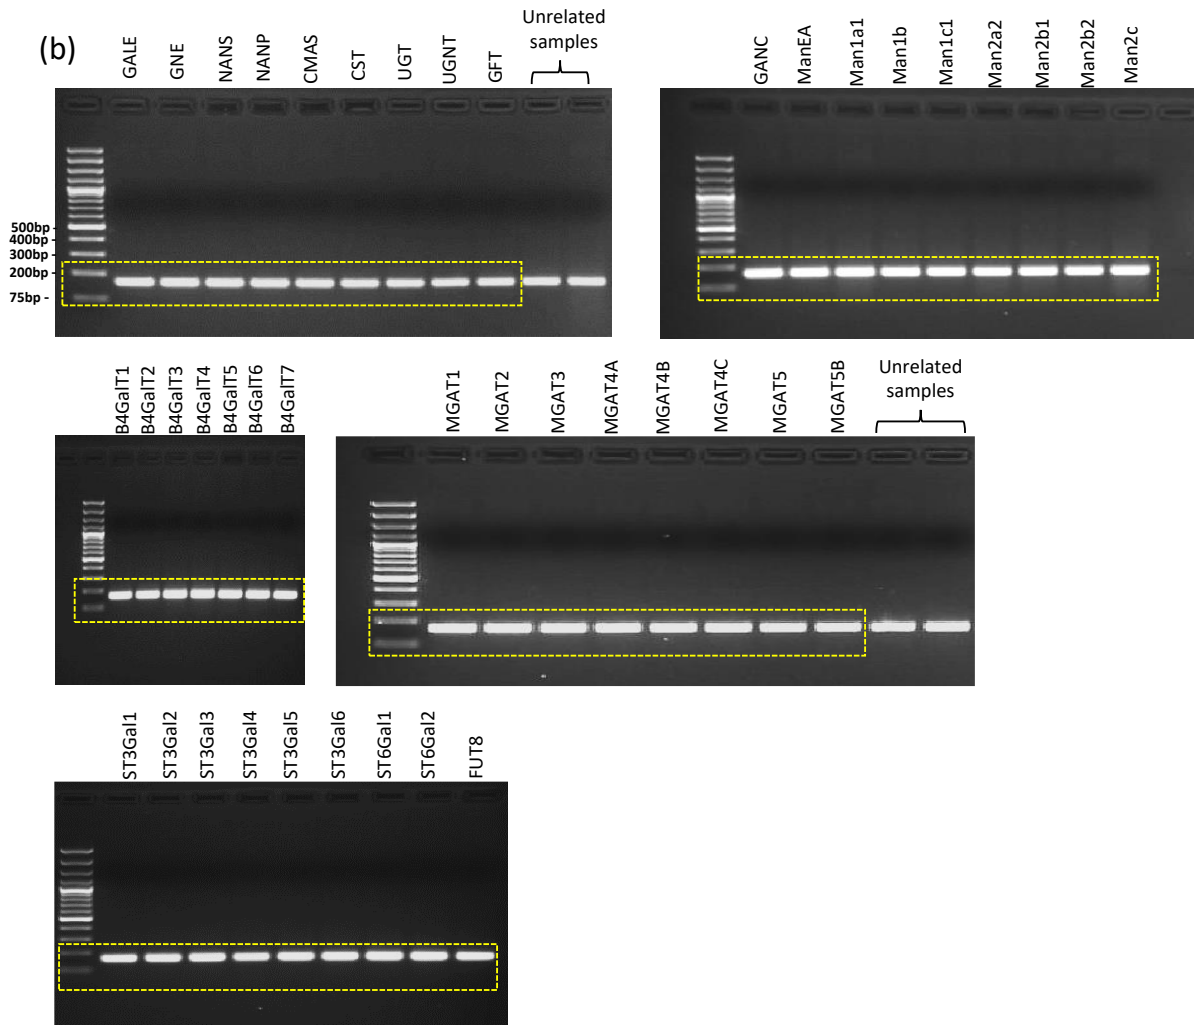

**Supplementary Figure S4.** Uncropped images of DNA gels shown in figure 2A. The yellow dotted lines indicated the corresponding regions in the main figure 2A. (a) The mRNA of each glycosyltransferase gene from the corresponding stable pools was analysed via RT-PCR and resolved in 2% agarose gels. (b) The mRNA of internal control ( $\beta$ -actin) of the corresponding stable pools was also analysed via RT-PCR and resolved in 2% agarose gels. No changes were done to the images' brightness and contrast.

(a) ST6Gal1 (2s exposure time)

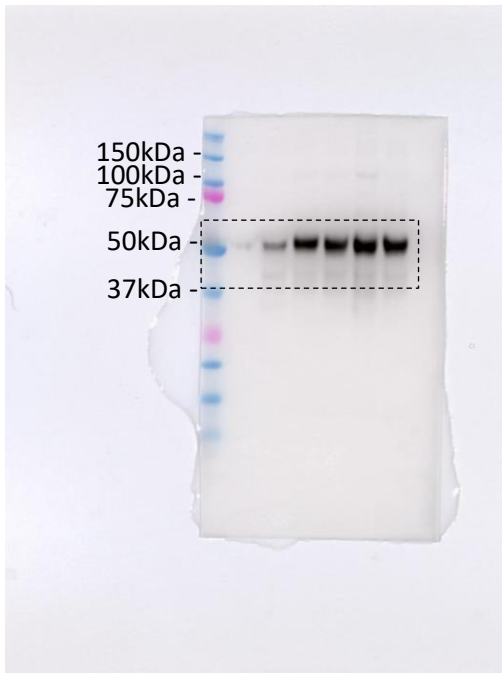

ST6Gal1 (5s exposure time)

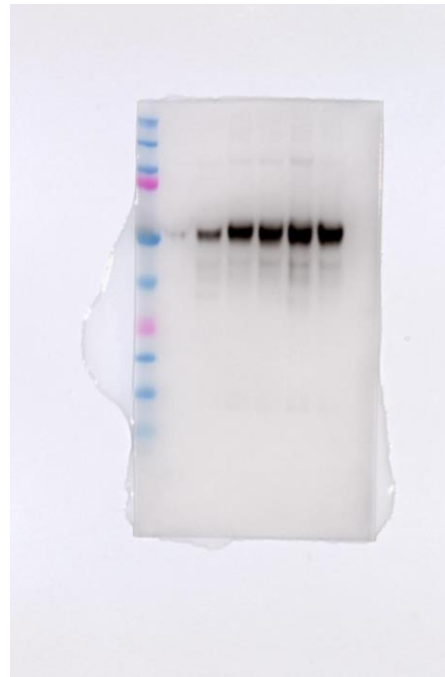

(b) GAPDH (1s exposure time)

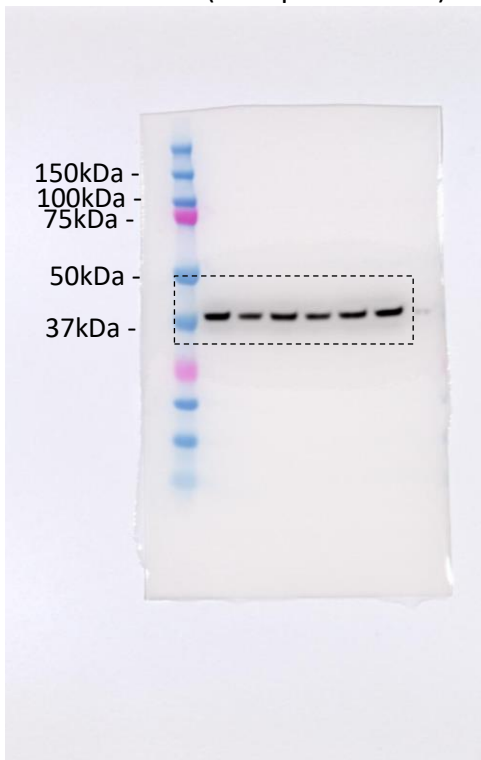

GAPDH (2s exposure time)

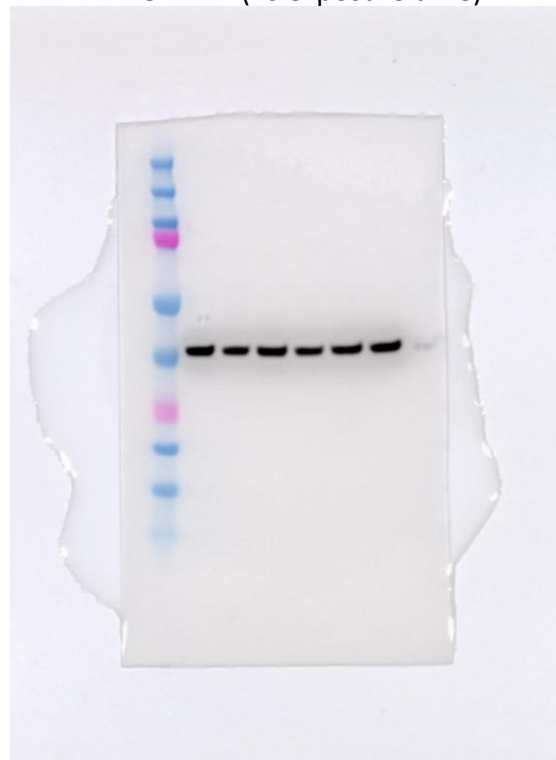

**Supplementary Figure S5.** Samples are separated on two SDS-PAGE gels. Each gel was then immunoblotted with the respective antibodies. (a) Uncropped image for figure 4A (upper panel). (b) Uncropped image for figure 4A (lower panel). The dotted lines indicated where the images were cropped from the original blots and presented in the main figure 4A. The images'



brightness and contrast were not adjusted, though the images were recoloured into grayscale. Two different exposure time for each blot were included.

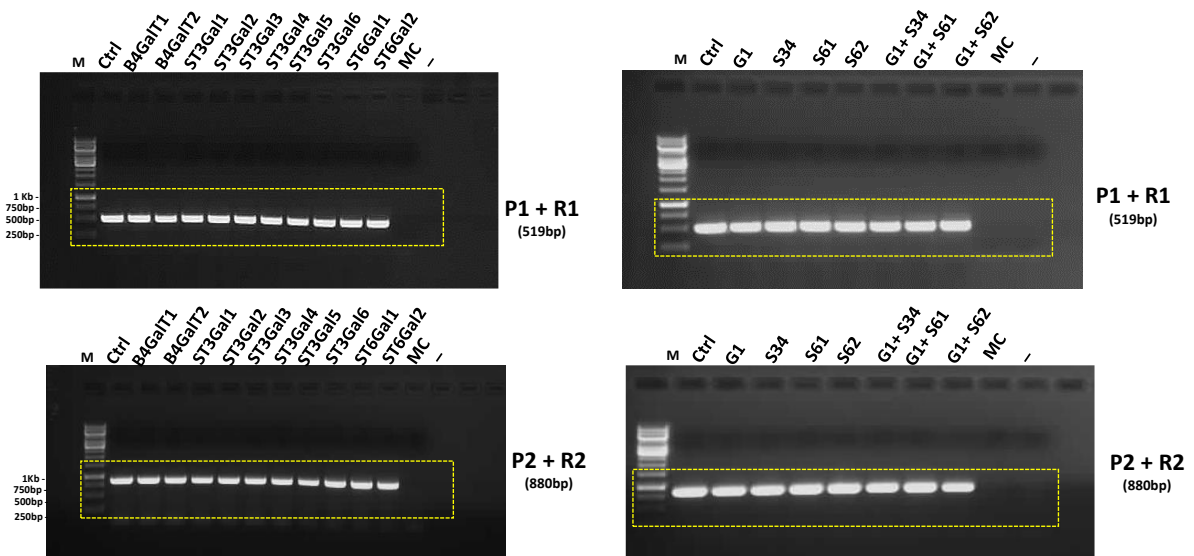

**Supplementary Figure S6.** Uncropped images of DNA gels shown in supplementary figure S1. The yellow dotted lines indicated the corresponding regions in the figure S1. No changes were done to the image's brightness or contrast.
